# Supplementary material for: EDA fibronectin–TLR4 axis sustains megakaryocyte expansion and inflammation in bone marrow fibrosis
Source: PubMed Central journal article supplement — J Exp Med. 2019 Mar 4;216(3):587–604. doi: 10.1084/jem.20181074 (PMC6400533; doi:10.1084/jem.20181074), 2019-03-04
Supplement: JEM_20181074_sm.pdf [file JEM_20181074_sm.pdf]

## Supplemental material

Malara et al., <https://doi.org/10.1084/jem.20181074>

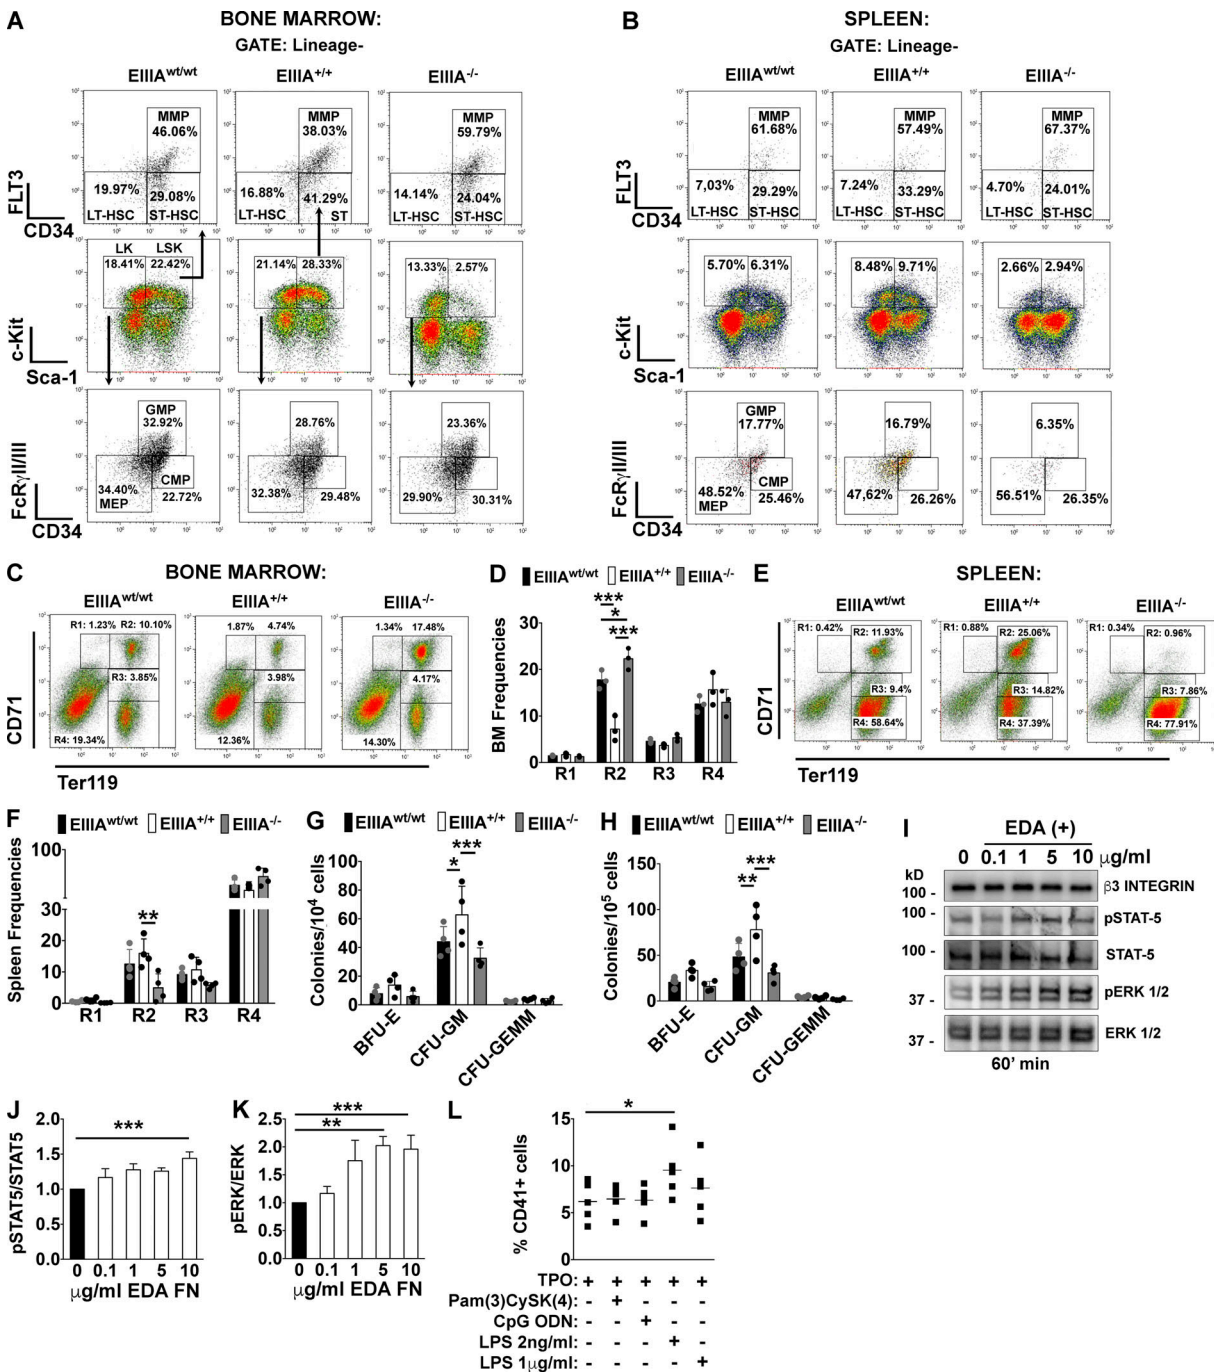

Figure S1. **Effects of EDA overexpression on hematopoietic progenitors in mice and concentration-dependent effects on Mk signaling pathway activation.** (A and B) Representative contour plots and gate strategy of flow cytometric analysis of LSK, LT-HSC (Lin<sup>-</sup>Sca-1<sup>+</sup>c-kit<sup>+</sup>CD34<sup>-</sup>CD135<sup>-</sup>), ST-HSC (Lin<sup>-</sup>Sca-1<sup>+</sup>c-kit<sup>+</sup>CD34<sup>+</sup>CD135<sup>-</sup>), MMP (Lin<sup>-</sup>Sca-1<sup>+</sup>c-kit<sup>+</sup>CD34<sup>+</sup>CD135<sup>+</sup>), CMP (Lin<sup>-</sup>Sca-1<sup>+</sup>c-kit<sup>+</sup>CD34<sup>+</sup>FcyRII/III<sup>low</sup>), GMP (Lin<sup>-</sup>Sca-1<sup>+</sup>c-kit<sup>+</sup>CD34<sup>+</sup>FcyRII/III<sup>high</sup>), and MEP (Lin<sup>-</sup>Sca-1<sup>+</sup>c-kit<sup>+</sup>CD34<sup>+</sup>FcyRII/III<sup>+</sup>) cells in the BM (A) and spleens (B) of EIIIA<sup>wt/wt</sup>, EIIIA<sup>+/+</sup>, and EIIIA<sup>-/-</sup> mice after experimental fibrosis. (C and D) Representative dot plots of flow cytometric analysis of erythroid precursors in the BM of EIIIA<sup>wt/wt</sup>, EIIIA<sup>+/+</sup> and EIIIA<sup>-/-</sup> mice after experimental fibrosis using surface markers CD71 and Ter119 (C). Frequencies of erythroid precursor cells are shown in bar graphs as mean ± SD (n = 3; D). (E and F) Representative dot plots of flow cytometric analysis of erythroid precursors in the spleens of EIIIA<sup>wt/wt</sup>, EIIIA<sup>+/+</sup>, and EIIIA<sup>-/-</sup> mice after experimental fibrosis using surface markers CD71 and Ter119 (E). Frequencies of erythroid precursor cells are shown in bar graphs as mean ± SD (n = 3; F). (G and H) BM cells (10<sup>4</sup>; G) and spleen cells (10<sup>5</sup>; H) from EIIIA<sup>wt/wt</sup>, EIIIA<sup>+/+</sup>, and EIIIA<sup>-/-</sup> mice (n = 4) were plated in methylcellulose medium supplemented with cytokines. BFU-E, CFU-GM, and CFU-GEMM colonies were scored 7 d after plating. (I) Purified Mk's were stimulated for 1 h with increasing concentration of cFN and the phosphorylation of STAT-5 and ERK 1/2 evaluated by Western blotting. β3 integrin was revealed to ensure the same number of Mk used in the experiment, while total STAT-5 and ERK 1/2 were detected to ensure equal protein loading. (J and K) Histograms showing the ratio of phosphorylated and total STAT-5 (J) and ERK 1/2 (K) proteins in mature Mk's stimulated with increasing amounts of cFN for 1 h. At least three independent experiments were performed. \*\*, P < 0.01; \*\*\*, P < 0.001. (L) Quantification of Mk output after 3 d of culture treated only with TPO, TPO plus 1 μg/ml of Pam3Csk4, TPO plus 3 μM CpG ODN, and TPO plus LPS (2 ng/ml and 1 μg/ml, respectively). Five independent experiments were performed. \*, P < 0.05.

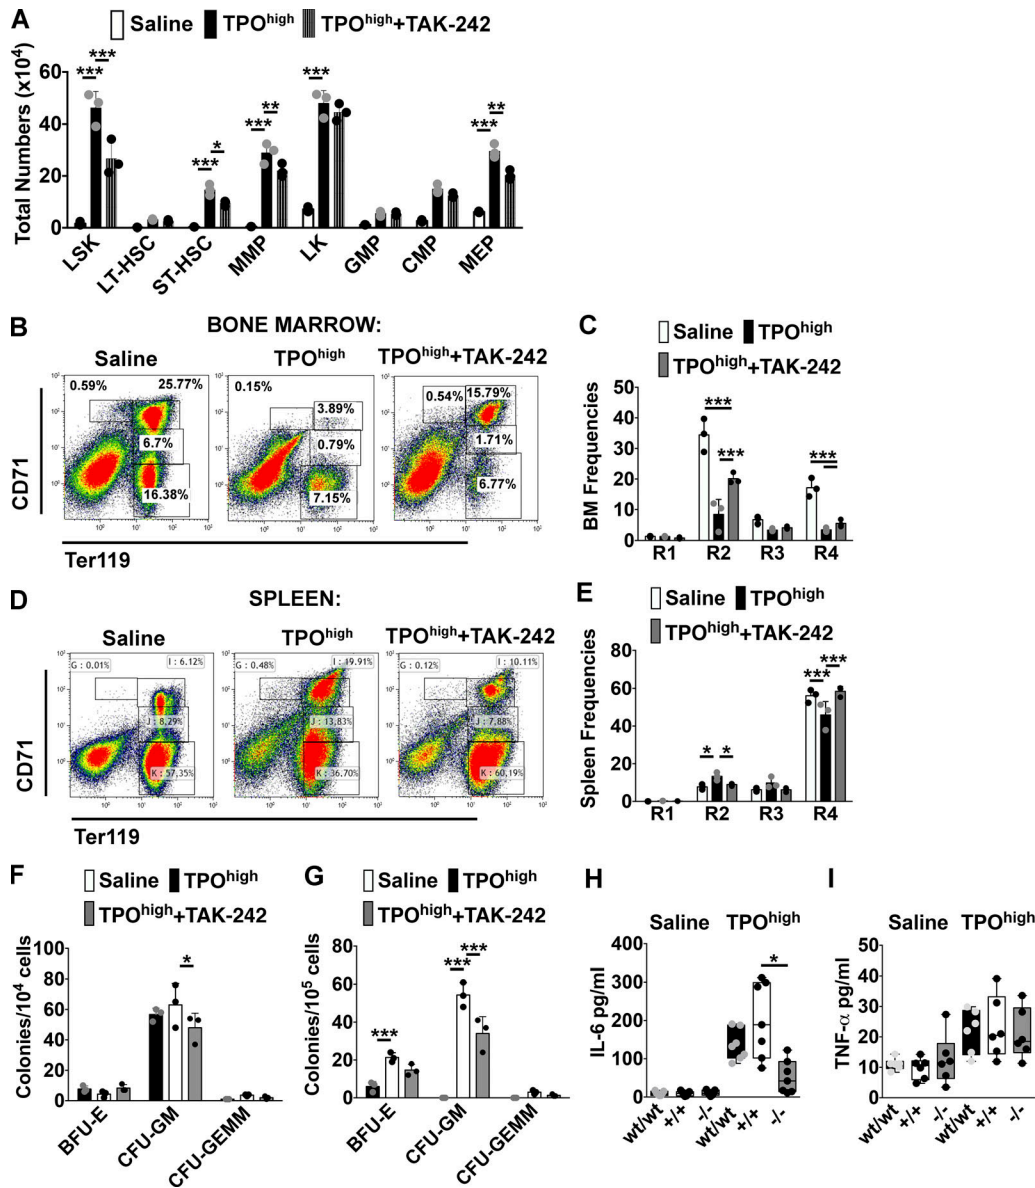

Figure S2. **Effects of TLR4 inhibition on hematopoietic progenitors in mice.** (A) Total numbers of LSK, LT-HSC, ST-HSC, MMP, CMP, GMP, and MEP cells in the spleens of saline-, TPO<sup>high</sup>-, and TPO<sup>high</sup> plus TAK-242-treated mice are shown in bar graphs as mean ± SD (*n* = 3). \*, *P* < 0.05; \*\*, *P* < 0.005; \*\*\*, *P* < 0.001. (B and C) Representative dot plots of flow cytometric analysis of erythroid precursors in the BM of saline-, TPO<sup>high</sup>-, and TPO<sup>high</sup> plus TAK-242-treated mice using surface markers CD71 and Ter119 (B). Frequencies of erythroid precursor cells are shown in bar graphs as mean ± SD (*n* = 3). (D and E) Representative dot plots of flow cytometric analysis of erythroid precursors in the BM of saline-, TPO<sup>high</sup>-, and TPO<sup>high</sup> plus TAK-242-treated mice using surface markers CD71 and Ter119 (D). Frequencies of erythroid precursor cells are shown in bar graphs as mean ± SD (*n* = 3); (E). (F and G) BM cells (10<sup>4</sup>; F) and spleen cells (10<sup>5</sup>; G) of saline-, TPO<sup>high</sup>-, and TPO<sup>high</sup> plus TAK-242-treated mice (*n* = 3) were plated in methylcellulose medium supplemented with cytokines. BFU-E, CFU-GM, and CFU-GEMM colonies were scored 7 d after plating. (H and I) Quantification of TNF-α (H) and IL-6 (*n* = 7; I) by ELISA in BM cell-free supernatants of wild-type, EIIIA<sup>+/-</sup>, and EIIIA<sup>-/-</sup> mice treated with saline or TPO. *n* = 7. \*, *P* < 0.05.

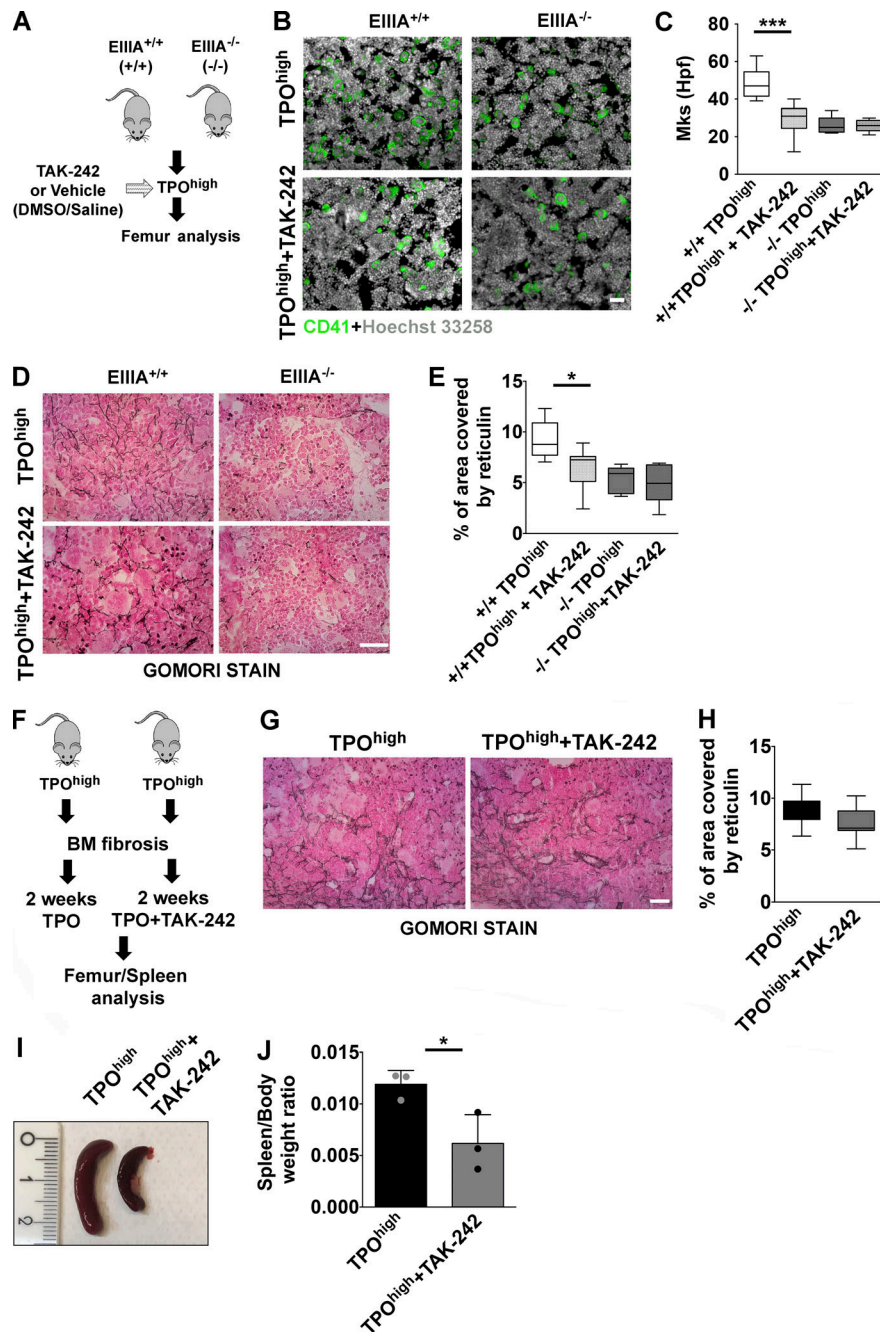

Figure S3. **TAK-242 treatment ameliorates Mk hyperplasia and BM fibrosis in EIIIA<sup>+/+</sup> mice while it has null effects in EIIIA<sup>-/-</sup> mice.** (A) Schematic representation of in vivo strategy for TLR4 inhibition in EIIIA<sup>+/+</sup> and EIIIA<sup>-/-</sup> mice during experimental fibrosis. (B) Representative immunofluorescence staining of CD41 Mks in BM sections of EIIIA<sup>+/+</sup> and EIIIA<sup>-/-</sup> mice treated with TPO plus vehicle or TPO plus TAK-242. Nuclei were stained with Hoechst 33258. Bar, 50 μm. (C) Quantification of CD41<sup>+</sup> Mks per high power field (hpf) in BM sections of EIIIA<sup>+/+</sup> and EIIIA<sup>-/-</sup> mice treated with TPO plus vehicle or TPO plus TAK-242. ≥100 Mks were randomly counted from five sections of three different mice per genotype in each experimental condition. \*\*\*, P < 0.001. (D) Representative Gomori staining in BM sections of EIIIA<sup>+/+</sup> and EIIIA<sup>-/-</sup> mice treated with TPO plus vehicle or TPO plus TAK-242. Bar, 50 μm. Objective, 40x. (E) Assessment of reticulin deposition in EIIIA<sup>+/+</sup> and EIIIA<sup>-/-</sup> mice treated with TPO plus vehicle or TPO plus TAK-242. ≥15 random images from BM diaphysis per mice, with three mice per treatment and genotype, were analyzed using Imagej software. \*, P < 0.05. (F) Schematic representation of in vivo strategy for TLR4 inhibition in TPO<sup>high</sup> mice after the BM fibrosis is already established. (G and H) Representative Gomori staining (G) and assessment of reticulin deposition (H) in BM sections of TPO<sup>high</sup> and TPO<sup>high</sup> plus TAK-242-treated mice. Bar, 50 μm. Objective, 40x. (I and J) Representative spleens (I) and spleen/body weight ratios (J) were calculated in TPO<sup>high</sup> and TPO<sup>high</sup> plus TAK-242-treated mice.

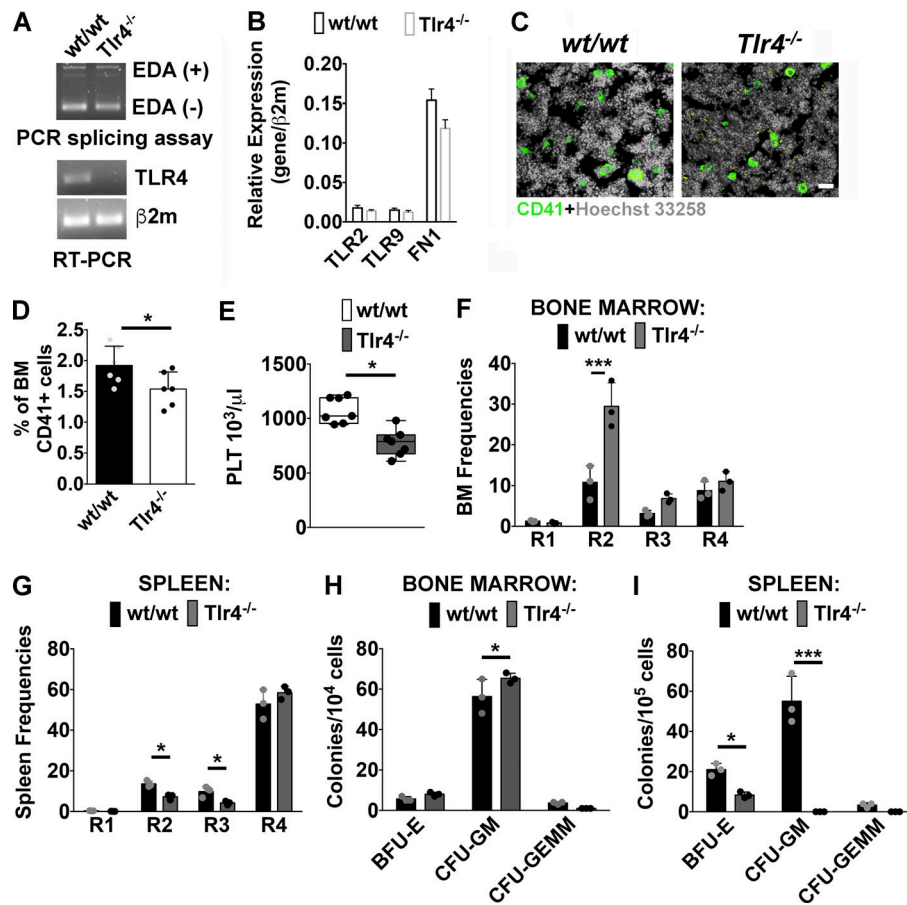

Figure S4. **TLR4 deletion in vivo induces a modest thrombocytopenia but restrains EDA FN effects on hematopoietic progenitors after experimental fibrosis.** (A) PCR splicing assay of EDA FN in BM cells recovered from untreated wild-type (*wt/wt*) and *Tlr4<sup>-/-</sup>* mice. Real-time PCR products of TLR4 expression confirmed the targeted deletion of TLR4 in the knockout mice.  $\beta 2$ -microglobulin was amplified for sample normalization. (B) Real-time PCR analysis of FN, TLR2, and TLR9 expression relative to  $\beta 2$ -microglobulin in BM cells of wild-type and *Tlr4<sup>-/-</sup>* mice.  $n = 3$ . (C and D) Immunofluorescence of CD41<sup>+</sup> Mk's in BM sections (C) and relative quantification (D) in untreated wild-type and *Tlr4<sup>-/-</sup>* mice. Bar, 50  $\mu m$ .  $n = 6$ . Nuclei were stained with Hoechst 33258. (E) Peripheral platelet (PLT) counts in untreated wild-type and *Tlr4<sup>-/-</sup>* mice.  $n = 7$ . (F and G) Frequencies of erythroid progenitors in BM (F) and spleens (G) of wild-type and *Tlr4<sup>-/-</sup>* mice after experimental fibrosis.  $n = 3$ . (H and I) BM cells ( $10^4$ ; H) and spleen cells ( $10^5$ ; I) of wild-type and *Tlr4<sup>-/-</sup>* mice after experimental fibrosis ( $n = 3$ ) were plated in methylcellulose medium supplemented with cytokines. BFU-E, CFU-GM, and CFU-GEMM colonies were scored 7 d after plating. \*,  $P < 0.05$ ; \*\*\*,  $P < 0.001$ .

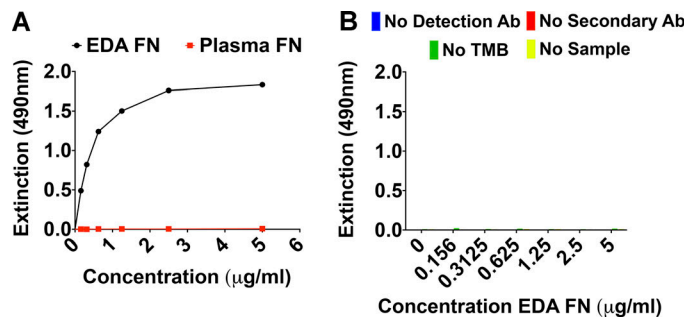

Figure S5. **Establishment of the specific ELISA for quantification of EDA FN in plasma samples.** (A) Evaluation of different EDA FN standard concentrations (black circles) and exclusion of cross-reactions to pFN (red squares). (B) Exclusion of cross-reactions to different components of the ELISA setup (no detection antibody (Ab), blue histograms; no secondary antibody, red histograms; no tetramethylbenzidine (TMB) ELISA substrate, green histograms; no sample, yellow histograms).
